# Supplementary material
Source: PubMed Central journal article supplement (PMC7606659)
Supplement: NIHMS1631318-supplement-esi.pdf [file NIHMS1631318-supplement-esi.pdf]

# **Multiplexed Analysis of Neural Cytokine Signaling by A Novel Neural Cell-Cell Interaction Microchip**

Mohammed A. A. Abdullah\*<sup>1,3</sup>, Nooshin Amini\*<sup>2</sup>, Liwei Yang,<sup>1</sup> Janet L. Paluh<sup>2#</sup>, Jun Wang<sup>1,2#</sup>

<sup>1</sup>Multiplex Biotechnology Laboratory, Department of Biomedical Engineering, Stony Brook University, Stony Brook, NY 11794.

<sup>2</sup>Nanobioscience, State University of New York Polytechnic Institute, Albany, NY 12203.

<sup>3</sup>Department of Chemistry, State University of New York at Albany, Albany, NY 12222

\*These co-authors contributed equally to this work.

#Corresponding authors. E-mail address: [jpaluh@sunypoly.edu](mailto:jpaluh@sunypoly.edu); [Jun.wang.5@stonybrook.edu](mailto:Jun.wang.5@stonybrook.edu)

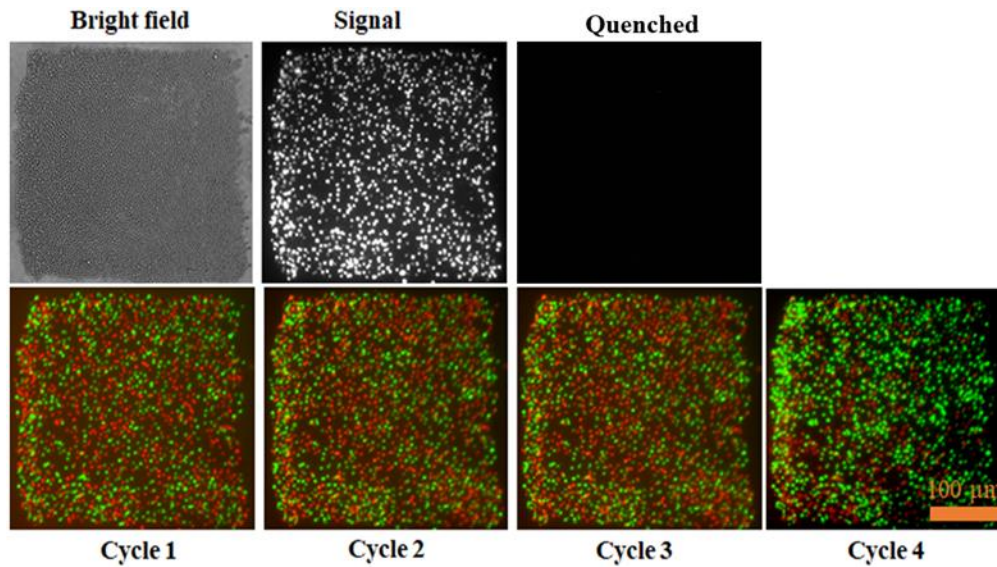

**Figure S1.** Images of a MIST array for protein detection and decoding. The top panel includes a bright-field image to show all the microbeads, a protein detection image when a recombinant protein is detected, and a quenched image after 0.5 NaOH is applied to dissociate double stranded DNA. The bottom panel images are decoding images from cycle 1 to cycle 4.

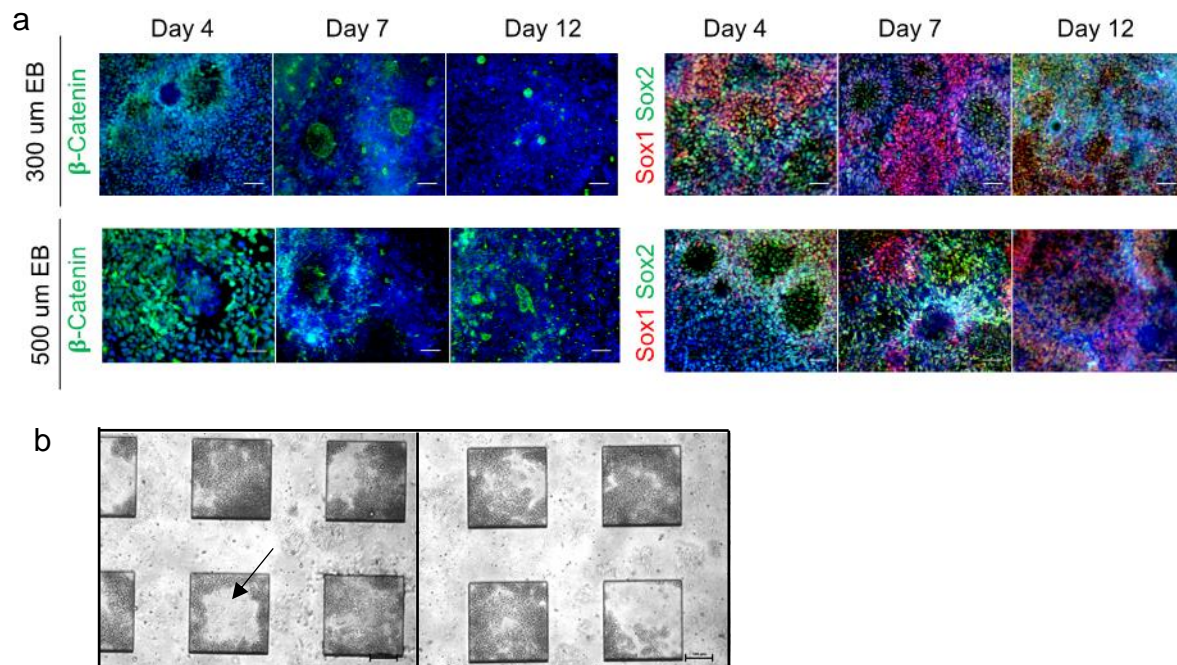

**Figure S2.** a) Evaluation of rosette formation on the dish from two EB sizes: 300  $\mu\text{m}$  and 500  $\mu\text{m}$ . Expression of tight junction protein B-catenin and early neural stem cell biomarkers Sox1/Sox2 were detected on days 4, 7 and 12 to determine the optimum size of PFMA chambers accommodating EBs. Scale bar is 50  $\mu\text{m}$ . b) Shallow chambers (100  $\mu\text{m}$ ) did not support attachment of EBs and they were lifted off after a day.

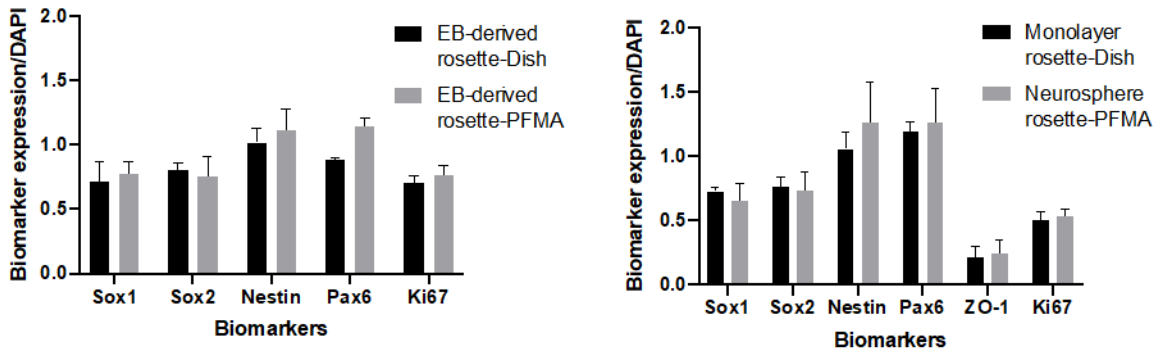

**Figure S3.** Expression of detected biomarkers by immunocytochemistry on three randomly selected fields from each condition was quantified using ImageJ software to quantitatively validate generated rosettes on PFMA versus dish. For statistical analysis, Two-way ANOVA and Sidak's multiple comparison test were used and no significant difference between each biomarker on the dish versus PFMA in monolayer and EB-derived rosettes was observed.

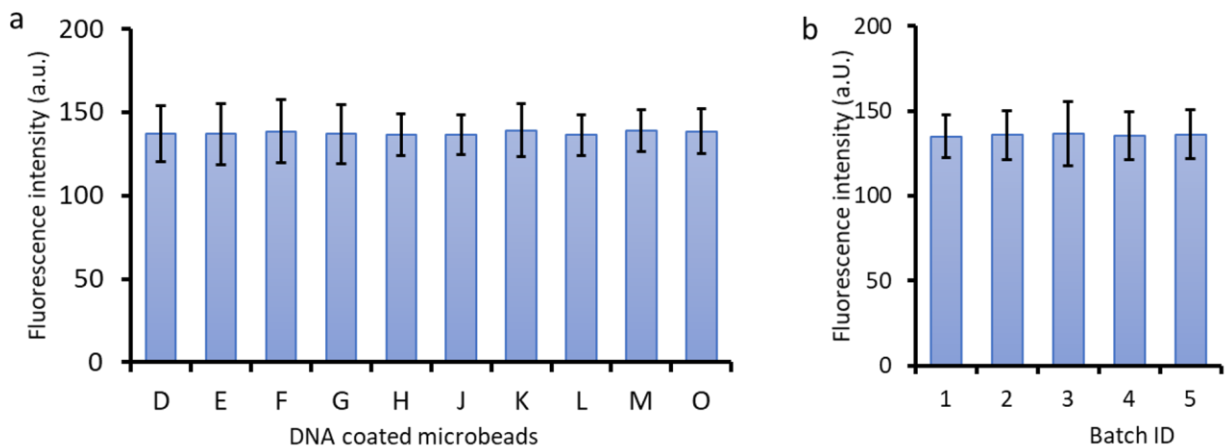

**Figure S4.** Reproducibility of the DNA microarray. (a) Fluorescence intensities of 10 types of DNA coated microarrays. Complementary DNAs tagged with Cy3 fluorophore are used to label the DNA microarrays, and the fluorescence intensities of 20 microbeads of each microarray are quantified and averaged. <5% variation is observed across different DNA microarrays. (b) Batch-to-batch variation of DNA microarray. D DNA was used to make 5 batches of DNA coated microbeads and microarrays. Cy3-complementary DNA was applied to show the fluorescence which was further quantified.

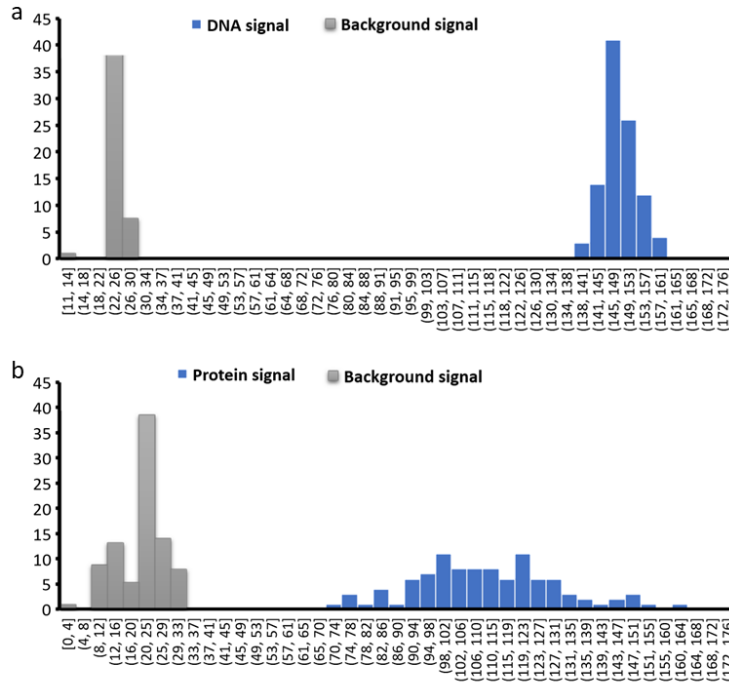

**Figure S5.** (a) Histograms of background fluorescence intensity and hybridized Cy3-cDNA fluorescence intensity from 100 microbeads. Background fluorescence intensity is obtained on the microbeads that are not labeled with Cy3-cDNA on the same microarray. Both histograms are widely separated without interferences. The fluorescence intensities of different Cy3-cDNA microbeads are varied by 3%. (b) Histograms of background fluorescence intensity and ELISA signal from 100 microbeads. Recombinant protein BDNF was used to measure the assay variation. The ELISA protein detection signals across microbeads are varied by 17%.

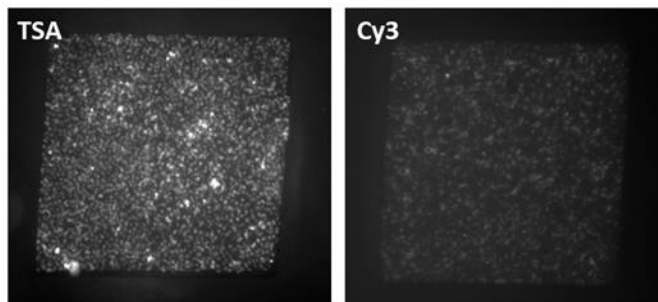

**Figure S6.** Image of TSA signal amplification and without amplification (Cy3) for protein detection. The average intensity of microbeads on the TSA image is only 6.8 times higher than that on the Cy3 image.

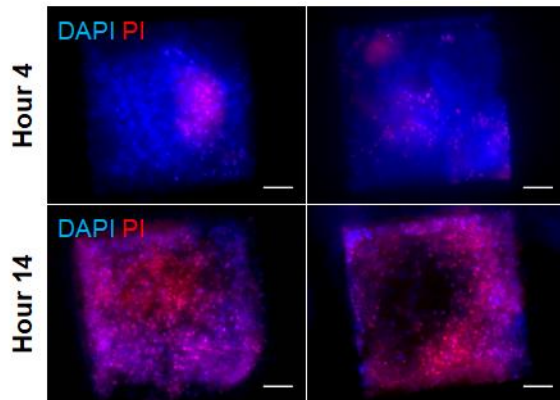

**Figure S7. Two flanking timepoints for cell viability in the NCCIM.** DAPI and Propidium Iodide (PI) reveal that cells clamped for 14 hours show considerable cell death that is not observed from an earlier 4 hour (shown) and 8 hour timepoints discussed in the text. The shorter time period did not give sufficient cytokine detection.

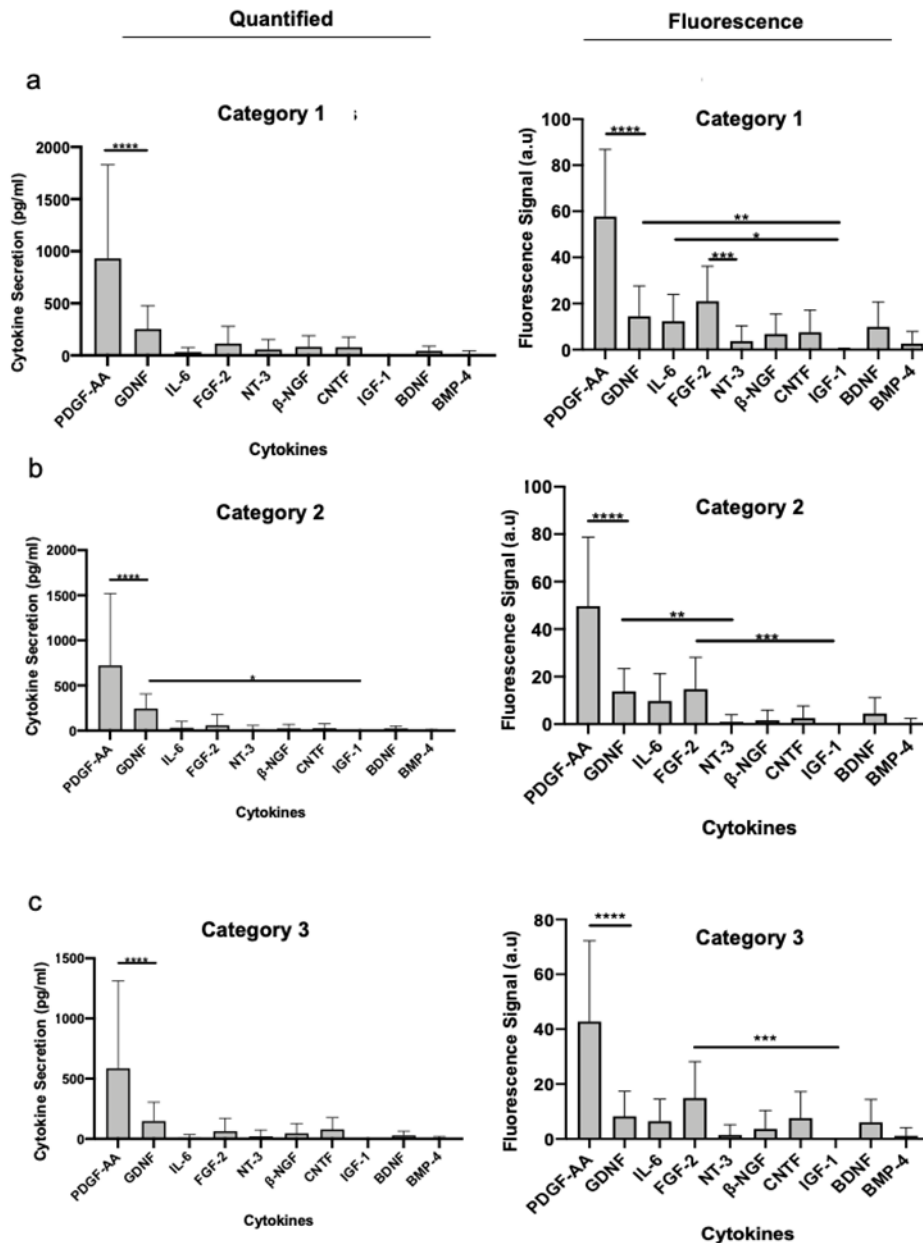

**Figure S8. Plots of quantified protein concentrations and fluorescence intensity of three categories of EB-derived rosettes.** Significant difference of mean values between cytokines in each category are calculated and shown as: P values: \*,  $P < 0.05$ ; \*\*,  $P < 0.01$ ; \*\*\*,  $P < 0.01$ ; \*\*\*\*,  $P < 0.0001$ .

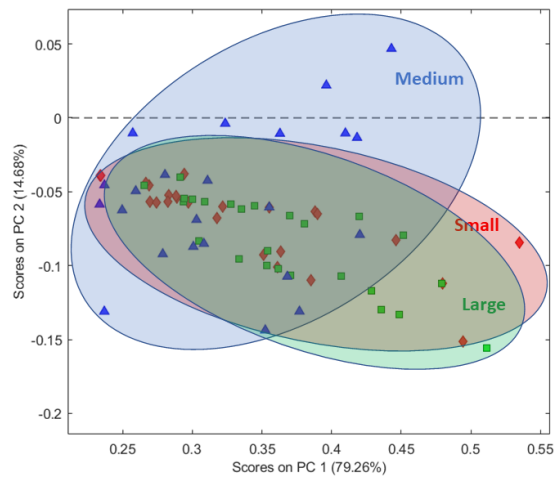

**Figure S9.** Principal component analysis (PCA) on NCCIM assay results of 3 sizes of rosettes. The medium size data are distinctively different while the small and large size data have significant overlap.

**Table S1.** NCCIM Cytokine Panel

| <b>Cytokines</b> | <b>Role</b>                                                              | <b>Signaling Pathways</b>                     | <b>References</b> |
|------------------|--------------------------------------------------------------------------|-----------------------------------------------|-------------------|
| PDGF-AA          | NPC survival and proliferation                                           | PI3K/Akt, PLC- $\gamma$ , MAPK                | [48, 49]          |
| GDNF             | Survival, maintenance of immature neurons, differentiation               | MAPK, PI3K/Akt, PLC- $\gamma$                 | [50, 51]          |
| BDNF             | Survival, maintenance and differentiation of developing neurons          | MAPK, PI3K/Akt, PLC- $\gamma$ , GTP-ases      | [62, 60]          |
| IL-6             | Neurogenesis, gliogenesis, inflammatory response                         | JAK/STAT, MAPK, PI3K/Akt, CREB                | [52, 54]          |
| $\beta$ -NGF     | Glial differentiation, inhibition of neural induction, neuronal survival | PI3K/Akt, MAPK, PLC- $\gamma$ , NF $\kappa$ B | [63, 64]          |
| BMP-4            | Glial differentiation, inhibition of neural induction                    | SMAD1, 5, 8, 4                                | [38, 65]          |
| NT-3             | Glial survival and differentiation, neuronal survival                    | PI3K/Akt, MAPK, PLC- $\gamma$ , NF $\kappa$ B | [63, 66]          |
| CNTF             | Astrocyte differentiation, glial and neuronal survival                   | JAK/STAT, NF $\kappa$ B                       | [63, 67]          |
| FGF-2            | Maintenance and expansion of NSC                                         | PI3K/Akt, MAPK                                | [28, 57, 58]      |
| IGF-1            | Proliferation of NPC, neuronal differentiation                           | MAPK, PI3K/Akt                                | [68, 69]          |



**Table S2.** Color scheme for decoding to determine the type of protein detected by the MIST sensor.

| <b>Antibody</b> | <b>DNA sequence</b>                 | <b>Cycle 1</b> | <b>Cycle 2</b> | <b>Cycle 3</b> | <b>Cycle 4</b> |
|-----------------|-------------------------------------|----------------|----------------|----------------|----------------|
| GDNF            | AAAAAAAAAAAAAATACTCTGACATCTCGACCAT  | Cy3            | Cy3            | Cy3            | Cy3            |
| PDGFAA          | AAAAAAAAAAAAAATAGATACTGCCACTTCACAT  | Cy3            | Cy3            | Cy3            | Cy5            |
| IL6             | AAAAAAAAAAAAAATACCGTGAACCTTACCTGAT  | Cy3            | Cy3            | Cy5            | Cy5            |
| CNTF            | AAAAAAAAAAAAAATGCTCGGGAAGGCTACTC    | Cy3            | Cy5            | Cy5            | Cy5            |
| IGF             | AAAAAAAAAAAAAACGCACCGCAGTTTGGTCAAT  | Cy5            | Cy5            | Cy5            | Cy5            |
| BDNF            | AAAAAAAAAAAAAACCTGCTCGACAACCTAGAAGA | Cy5            | Cy5            | Cy5            | Cy3            |
| FGF             | AAAAAAAAAAAAAACCGCGACCAGAATTAGATTA  | Cy5            | Cy5            | Cy3            | Cy3            |
| NT-3            | AAAAAAAAAAAAAAGCCGAAGCAGACTTAATCAC  | Cy5            | Cy3            | Cy3            | Cy3            |
| BMP-4           | AAAAAAAAAAAAAACAGGTTTCAGAATCCTCGAC  | Cy5            | Cy3            | Cy5            | Cy3            |
| $\beta$ -NGF    | AAAAAAAAAAAAAAGTCACAGACTAGCCACGAAG  | Cy3            | Cy5            | Cy3            | Cy5            |

**Table S3.** Percent Viability in NCCIM microchambers of EB-derived and neurosphere rosettes after 8 hours in the NCCIM.

| Viable<br>Cells % | EB-derived rosette |                |                |                | Rosette neurospheres |                |
|-------------------|--------------------|----------------|----------------|----------------|----------------------|----------------|
|                   | Hour 0             |                | Hour 8         |                | Hour 0               | Hour 8         |
|                   | PFMA 1<br>N=30     | PFMA 2<br>N=30 | PFMA 1<br>N=30 | PFMA 2<br>N=30 | PFMA 1<br>N=30       | PFMA 1<br>N=30 |
| <b>80-100%</b>    | 73                 | 94             | 55             | 69             | 73                   | 55             |
| <b>60-80%</b>     | 18                 | 6              | 24             | 25             | 27                   | 23             |
| <b>40-60%</b>     | 9                  | 0              | 9              | 0              | 0                    | 15             |
| <b>20-40%</b>     | 0                  | 0              | 6              | 6              | 0                    | 7              |
| <b>0-20%</b>      | 0                  | 0              | 6              | 0              | 0                    | 0              |

**Table S4.** Mean of quantified signal of detected cytokines of EB-derived rosettes and rosette neurospheres  $\pm$  standard deviation (SD)

| Examined Cytokines | EB-derived Rosettes<br>N=25 each |                              |                        | Rosette Neurosphere<br>N=5 |
|--------------------|----------------------------------|------------------------------|------------------------|----------------------------|
|                    | Category 1<br>(small)            | Category 2<br>(Large single) | Category 3<br>(Medium) |                            |
| PDGF-AA            | 931.5 $\pm$ 898.2                | 722.6 $\pm$ 797.2            | 586.1 $\pm$ 727.4      | 25.8 $\pm$ 16.7            |
| GDNF               | 254.2 $\pm$ 222.9                | 243.3 $\pm$ 163.3            | 146.3 $\pm$ 158.6      | 4.01 $\pm$ 8.9             |
| IL-6               | 32.07 $\pm$ 43.1                 | 31.1 $\pm$ 70.9              | 11.9 $\pm$ 23.4        | 0 $\pm$ 0                  |
| FGF-2              | 113.4 $\pm$ 165.1                | 58.5 $\pm$ 120.02            | 62.7 $\pm$ 108.3       | 23.1 $\pm$ 30.4            |
| $\beta$ -NGF       | 81.9 $\pm$ 107.6                 | 21.8 $\pm$ 47.9              | 45.7 $\pm$ 81.2        | 8.7 $\pm$ 19.4             |
| NT-3               | 57.6 $\pm$ 95.1                  | 14.5 $\pm$ 42.7              | 21.03 $\pm$ 51.7       | 0 $\pm$ 0                  |
| CNTF               | 78.5 $\pm$ 96.9                  | 26.1 $\pm$ 49.8              | 78.5 $\pm$ 96.9        | 0 $\pm$ 0                  |
| BMP-4              | 14.8 $\pm$ 30.6                  | 2.4 $\pm$ 8.7                | 5.1 $\pm$ 14.2         | 0 $\pm$ 0                  |
| BDNF               | 44.3 $\pm$ 45.1                  | 22.2 $\pm$ 29.1              | 28.3 $\pm$ 34.9        | 21.9 $\pm$ 37.6            |
| IGF-1              | 0.7 $\pm$ 3.7                    | 0 $\pm$ 0                    | 0 $\pm$ 0              | 0 $\pm$ 0                  |

**Table S5.** Signaling profiles of neural rosette subtypes in individual microchambers. Abbreviations refer to Cat 1: EB-derived small rosettes, Cat 2: EB-derived large rosettes, Cat 3: EB-derived medium rosettes, NS-R: neurosphere rosettes.

|             |      | PDGF-AA | GDNF | IL-6 | FGF-2 | NT-3 | NGF | CNTF | IGF-1 | BDNF | BMP-4 |
|-------------|------|---------|------|------|-------|------|-----|------|-------|------|-------|
| Cat 1       | 1/75 | +       | +    | +    | +     | +    | +   | +    | +     | +    | +     |
| Cat 1.2.3   | 9/75 | +       | +    | +    | +     | +    | +   | +    |       | +    | +     |
| Cat 1       | 2/75 | +       | +    | +    | +     | +    | +   | +    |       | +    |       |
| Cat 3       | 2/75 | +       | +    | +    | +     | +    | +   |      |       | +    | +     |
| Cat 3       | 1/25 | +       | +    | +    | +     | +    | +   |      |       | +    |       |
| Cat 1,2     | 3/75 | +       | +    | +    | +     |      | +   | +    |       | +    |       |
| Cat 1, 2, 3 | 5/75 | +       | +    | +    |       |      | +   | +    |       | +    |       |
| Cat 3       | 1/75 | +       | +    | +    | +     |      |     | +    |       | +    |       |
| Cat 1.2     | 3/75 | +       | +    | +    | +     |      |     |      |       | +    |       |
| Cat 1       | 1/75 | +       | +    |      |       |      | +   | +    |       | +    |       |
| Cat 3       | 1/75 | +       | +    | +    |       |      |     | +    |       | +    |       |
| Cat 3       | 1/75 | +       |      |      | +     |      | +   | +    |       | +    |       |
| Cat 2       | 1/75 | +       |      | +    |       |      | +   | +    |       | +    |       |
| Cat 1.2     | 2/75 | +       | +    | +    |       | +    |     |      |       |      |       |
| Cat 2       | 2/75 | +       | +    | +    |       |      |     |      |       | +    |       |

|              |       |   |   |   |   |  |   |   |  |   |  |
|--------------|-------|---|---|---|---|--|---|---|--|---|--|
| Cat<br>1,3   | 2/75  | + |   | + |   |  |   | + |  | + |  |
| Cat<br>1,2   | 2/75  | + | + |   |   |  |   | + |  | + |  |
| Cat 3        | 1/75  | + |   | + |   |  | + |   |  | + |  |
| Cat 3        | 1/75  | + |   |   | + |  | + |   |  | + |  |
| Cat<br>1,2,3 | 11/75 | + | + | + |   |  |   |   |  |   |  |
| Cat 3        | 1/75  | + |   | + |   |  |   | + |  |   |  |
| Cat<br>2,3   | 2/75  | + | + |   |   |  |   |   |  |   |  |
| Cat<br>1,3   | 2/75  | + |   |   | + |  |   |   |  |   |  |
| Cat 3        | 3/25  | + |   |   |   |  |   | + |  |   |  |
| Cat 3        | 1/25  |   |   |   |   |  |   | + |  |   |  |
| Cat<br>1,2   | 7/75  | + |   |   |   |  |   |   |  |   |  |
| Cat<br>2,3   | 3/75  |   | + |   |   |  |   |   |  |   |  |

**Table S6.** Variation seen in quantified signal of detected cytokines of rosette neurospheres in individual chambers

| <b>Cytokines</b>              | <b>Chamber 1</b> | <b>Chamber 2</b> | <b>Chamber 3</b> | <b>Chamber 4</b> | <b>Chamber 5</b> |
|-------------------------------|------------------|------------------|------------------|------------------|------------------|
| <b>PDGF-AA</b>                | 20.3             | 0                | 42.5             | 29.3             | 37.1             |
| <b>GDNF</b>                   | 20.1             | 0                | 0                | 0                | 0                |
| <b>II-6</b>                   | 0                | 0                | 0                | 0                | 0                |
| <b>FGF2</b>                   | 14.6             | 27.3             | 73.5             | 0                | 0                |
| <b>NT-3</b>                   | 0                | 0                | 0                | 0                | 0                |
| <b><math>\beta</math>-NGF</b> | 43.5             | 0                | 0                | 0                | 0                |
| <b>CNTF</b>                   | 0                | 0                | 0                | 0                | 0                |
| <b>IGF-1</b>                  | 0                | 0                | 0                | 0                | 0                |
| <b>BDNF</b>                   | 86.8             | 23.04            | 0                | 0                | 0                |
| <b>BMP-4</b>                  | 0                | 0                | 0                | 0                | 0                |
